# Supplementary material for: Synthesis and Characterisation of Hemihydrate Gypsum–Polyacrylamide Composite: A Novel Inorganic/Organic Cementitious Material
Source: MDPI journal article supplement (doi:10.3390/ma17071510), 2024-03-26
Supplement: s1 [file s1]

## **Supplemental Information**

Figure S1. Schematic diagram of the initial setting time test method for  $\alpha$ -HHG/PAM composite material.

Figure S2. Schematic diagram of the flowability test method for  $\alpha$ -HHG/PAM composite material slurry.

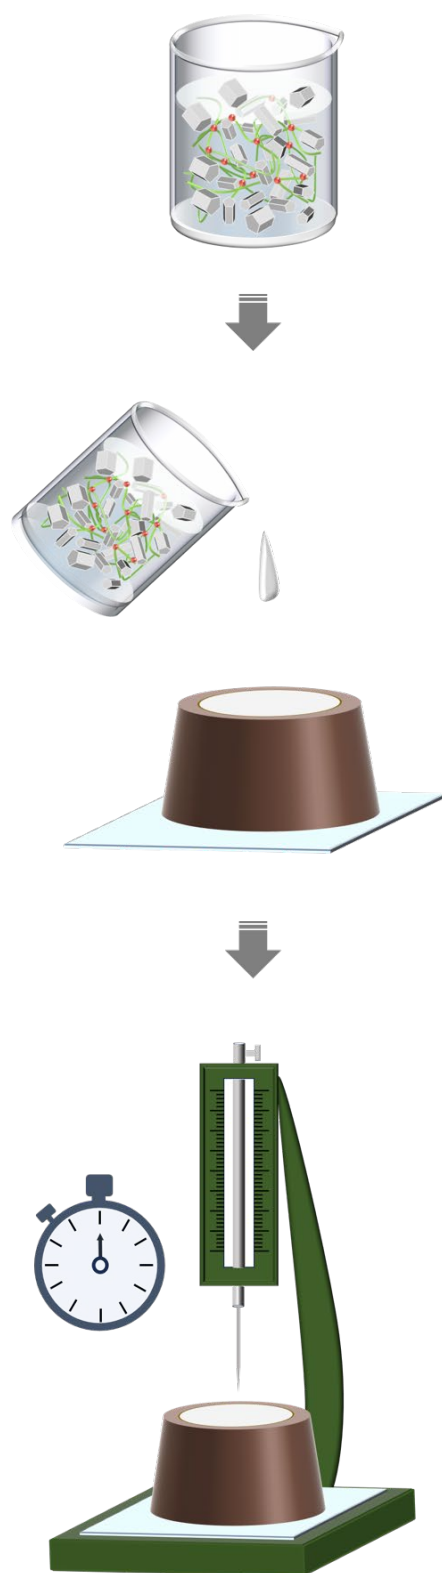

Figure S1. Schematic diagram of the initial setting time test method for  $\alpha$ -HHG/PAM composite material.

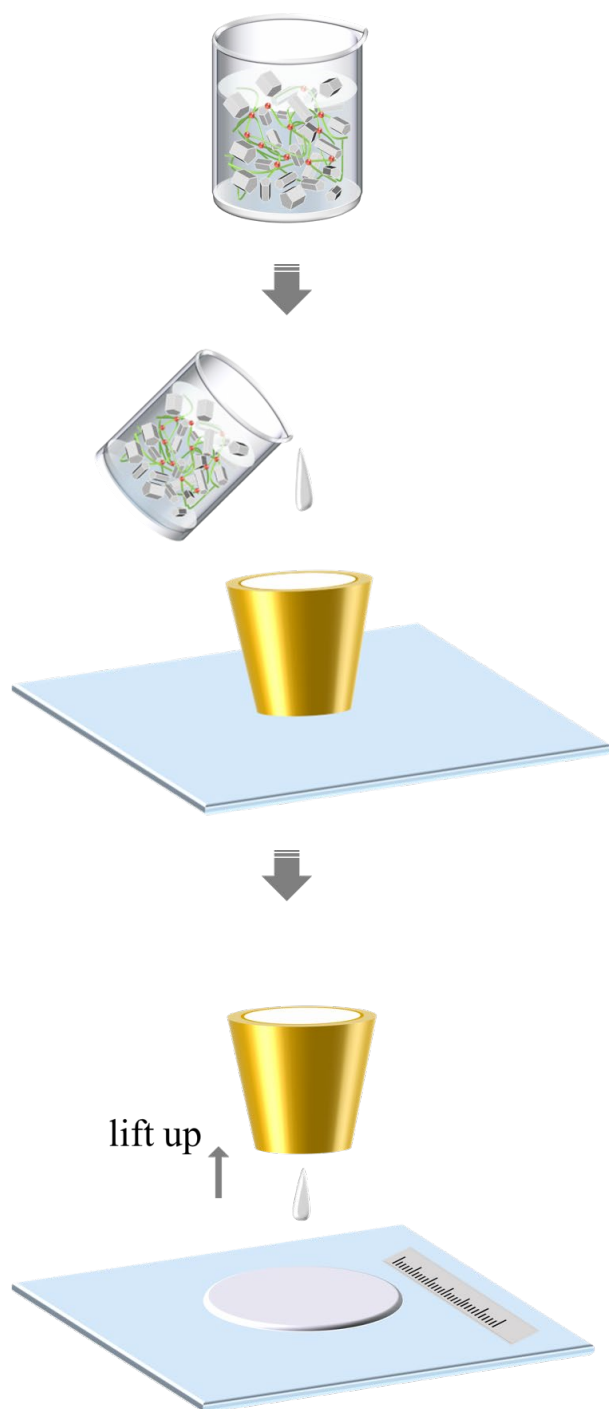

Figure S2. Schematic diagram of the flowability test method for  $\alpha$ -HHG/PAM composite material slurry.
